# Supplementary material
Source: publisher figshare collection journal article supplement (https://karger.figshare.com/articles/dataset/_/4697722)
Supplement: Supplementary file 1 [file 1 › 462986_sm1.pdf]

## **Data Supplement**

**p2 Table e-1: Characteristics of study participants**

**p3 Table e-2: Risk of bias summary table**

**p4-7 Figure e-1: Early neurological deterioration, hypotension, severe hypotension, any serious treatment-related adverse event, recurrent stroke, acute coronary event and renal failure in intensive versus conservative blood pressure lowering therapy**

**p8-9 Figure e-2: Systolic blood pressure levels at 1, 6 and 24 hours since randomization in intensive versus conservative treatment**

**p10 Table e-3 Estimates of outcomes from random-effects analysis**

**p11 e-Appendix I: Search strategy**

**p12-17 e-Appendix II: Funnel plots**

**p18 e-Reference**

**Table e-1. Characteristics of study participants**

| Reference study, year        | Treatment arm | Subjects, no. | Male, (%) | Age, years, mean (SD) | GCS, median (IQR) | Baseline NIHSS mean (SD)/ median (IQR) | ICH volume, ml, mean (SD)/ median (IQR) | Onset to randomization, hours mean (SD)/ median (IQR) |
|------------------------------|---------------|---------------|-----------|-----------------------|-------------------|----------------------------------------|-----------------------------------------|-------------------------------------------------------|
| <b>Koch et al., 2008 [9]</b> | Intensive     | 21            | 42.9      | 61.2 (13.0)           | 13.5 (9-15)       | 12.0 (7.0)                             | 12.5 (17.2)                             | 3.13 (2.22) <sup>†</sup>                              |
|                              | Conservative  | 21            | 66.7      | 60.0 (11.0)           | 15 (10-15)        | 10.9 (6.5)                             | 8.5 (9.8)                               | 3.23 (2.24) <sup>†</sup>                              |
| <b>INTERACT-1, 2008 [10]</b> | Intensive     | 203           | 60.6      | 63.0 (12.0)           | 14 (13-15)        | 9 (5-14)                               | 14.2 (14.5)                             | 3.70 (2.90-4.80)                                      |
|                              | Conservative  | 201           | 69.2      | 62.0 (13.0)           | 14 (12-15)        | 9 (5-16)                               | 12.7 (11.6)                             | 3.60 (2.90-4.90)                                      |
| <b>INTERACT-2, 2013 [11]</b> | Intensive     | 1399          | 64.2      | 63.0 (13.1)           | 14 (12-15)        | 10 (6-15)                              | 11 (6-19)                               | 3.70 (2.80-4.80)                                      |
|                              | Conservative  | 1430          | 61.7      | 64.1 (12.6)           | 14 (12-15)        | 11 (6-16)                              | 11 (6-20)                               | 3.70 (2.90-4.70)                                      |
| <b>ICH-ADAPT, 2013 [12]</b>  | Intensive     | 39            | 66.7      | 70.7 (12.5)           | 15 (4-15)         | 10 (6-18)                              | 25.98 (30.84)                           | 7.83 (3.25-16.75)                                     |
|                              | Conservative  | 36            | 77.8      | 68.7 (11.1)           | 15 (6-15)         | 11 (5.5-15.5)                          | 26.86 (25.24)                           | 8.54 (3.80-15.75)                                     |
| <b>ATACH-2, 2016 [13]</b>    | Intensive     | 500           | 60.8      | 62.0 (13.1)           | 15 (13-15)        | 11 (0-40) <sup>‡</sup>                 | 10.3 (2.3-85.2) <sup>‡</sup>            | 3.04 (0.95)                                           |
|                              | Conservative  | 500           | 63.2      | 61.9 (13.1)           | 15 (13-15)        | 11 (0-40) <sup>‡</sup>                 | 10.2 (0.98-79.1) <sup>‡</sup>           | 3.08 (0.95)                                           |

<sup>†</sup>Onset to treatment. <sup>‡</sup>Median (range).

Abbreviations: ATACH=Antihypertensive Treatment of Acute Cerebral Hemorrhage; GCS=Glasgow Coma Scale; ICH=intra-cerebral hemorrhage; ICH ADAPT=The Intracerebral Hemorrhage Acutely Decreasing Arterial Pressure Trial; INTERACT=Intensive Blood Pressure Reduction in Acute Cerebral Haemorrhage Trial; IQR=interquartile range; NIHSS=National Institute of Health Stroke Scale; SD=standard deviation.

**Table e-2 Risk of bias summary table**

| Study \ Bias                                                 | Koch et al.,<br>2008                                                                | INTERACT-<br>1, 2008                                                                | INTERACT-<br>2, 2013                                                                 | ICH-<br>ADAPT,<br>2013                                                                | ATACH-2,<br>2016                                                                      |
|--------------------------------------------------------------|-------------------------------------------------------------------------------------|-------------------------------------------------------------------------------------|--------------------------------------------------------------------------------------|---------------------------------------------------------------------------------------|---------------------------------------------------------------------------------------|
| Random sequence generation<br>(Selection Bias)               | 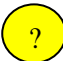   | 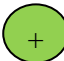   | 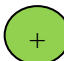   | 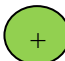   | 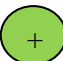   |
| Allocation concealment<br>(Selection Bias)                   | 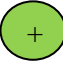   | 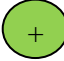   | 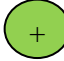   | 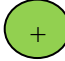   | 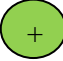   |
| Blinding of participants and<br>personnel (Performance Bias) | 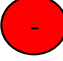   | 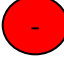   | 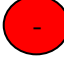   | 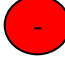   | 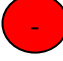   |
| Blinding of outcome<br>assessment (Detection Bias)           | 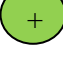   | 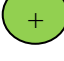   | 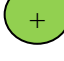   | 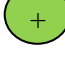   | 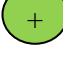   |
| Incomplete outcome data<br>(Attrition Bias)                  | 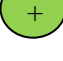   | 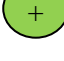   | 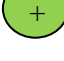   | 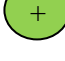   | 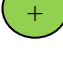   |
| Selective reporting<br>(Reporting Bias)                      | 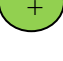 | 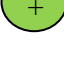 | 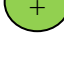 | 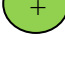 | 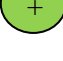 |
| Other sources of bias                                        | 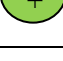 | 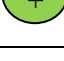 | 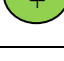 | 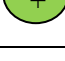 | 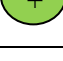 |

Legend: 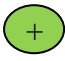 low, 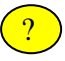 unclear and 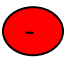 high risk of bias.

Abbreviations: ATACH=Antihypertensive Treatment of Acute Cerebral Hemorrhage; ICH

ADAPT=The Intracerebral Hemorrhage Acutely Decreasing Arterial Pressure Trial;

INTERACT=Intensive Blood Pressure Reduction in Acute Cerebral Haemorrhage Trial.

**Figure e-1: Early neurological deterioration, hypotension, severe hypotension, serious treatment-related adverse events, recurrent stroke, acute coronary event and renal failure in intensive versus conservative blood pressure lowering therapy**

### A. Early neurological deterioration

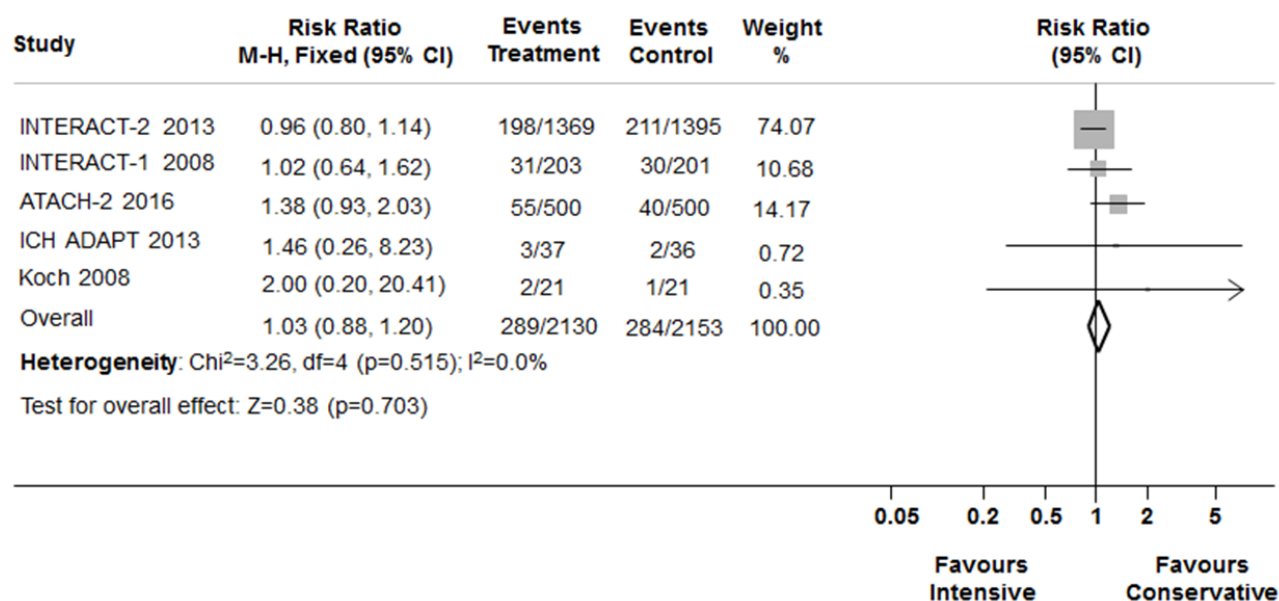

### B. Hypotension within 72 hours after randomization

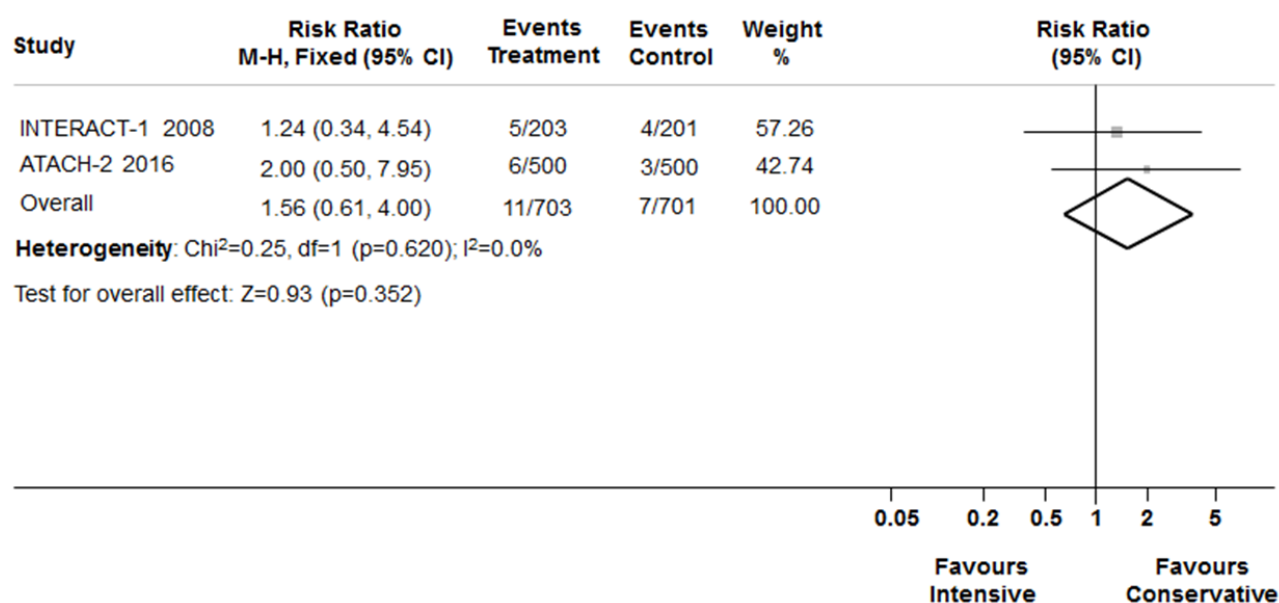

### C. Severe hypotension within 72 hours after randomization

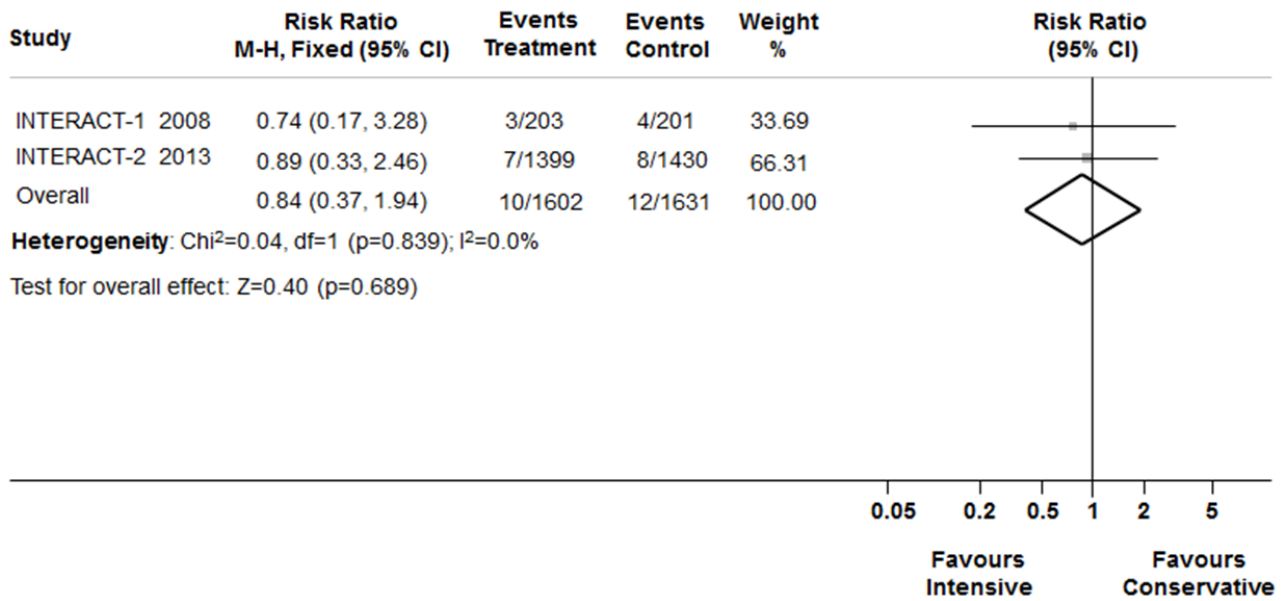

### D. Any serious treatment-related adverse event within 3-months after randomization

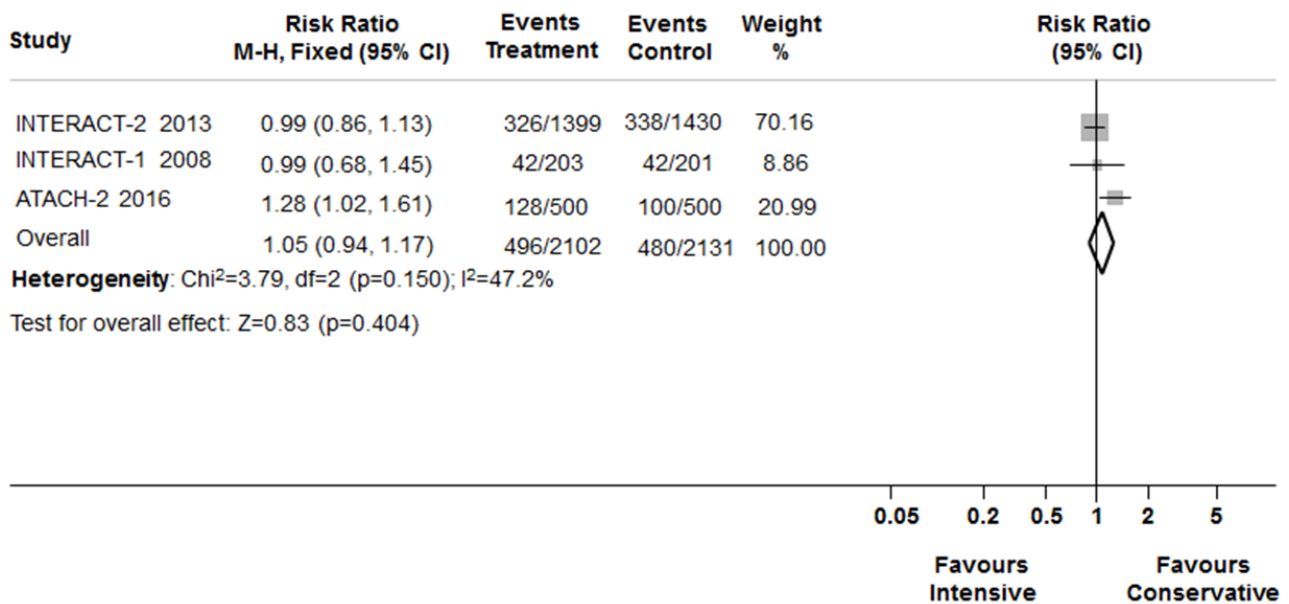

## E. Recurrent stroke (ischemic or haemorrhagic)

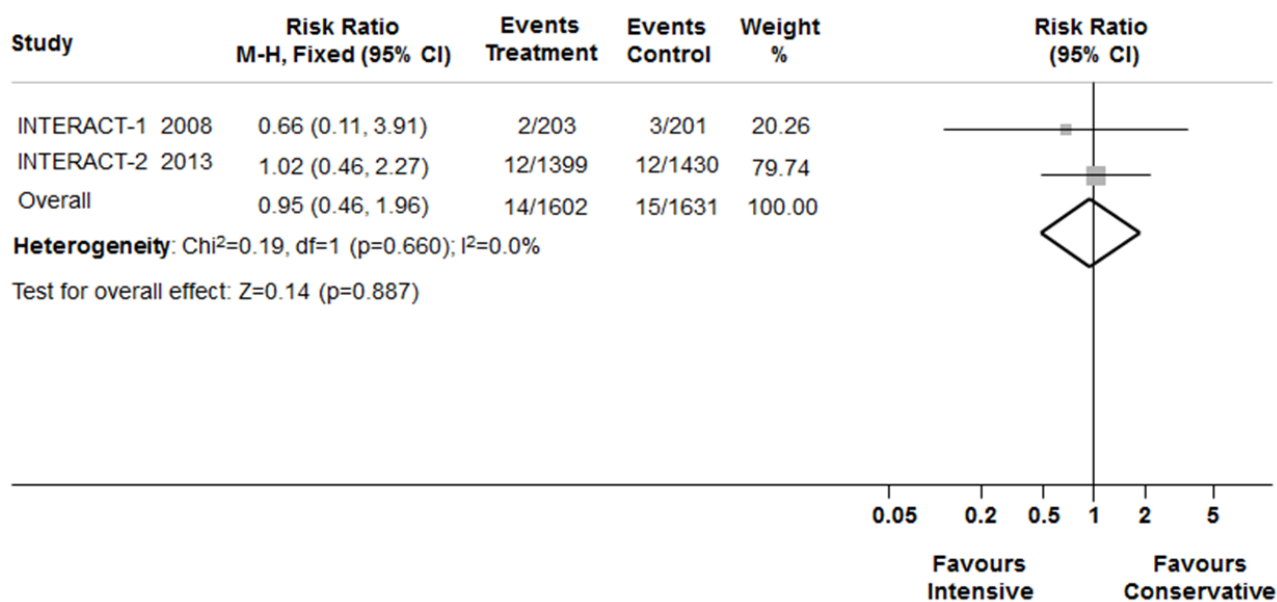

## F. Acute coronary events

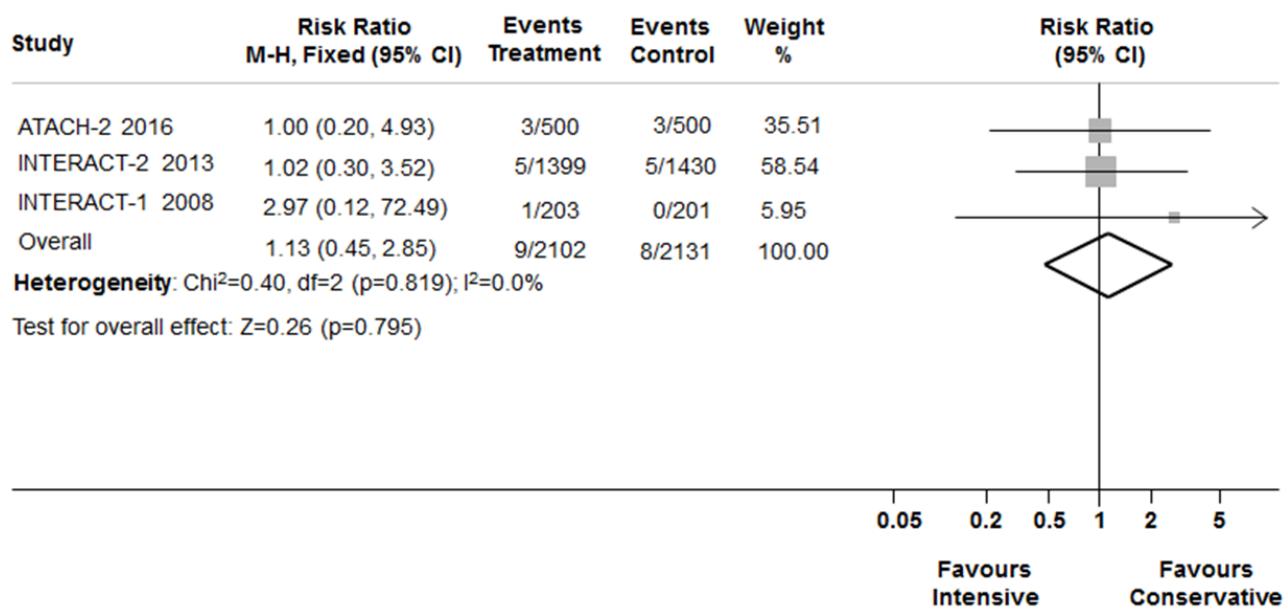

## G. Renal failure

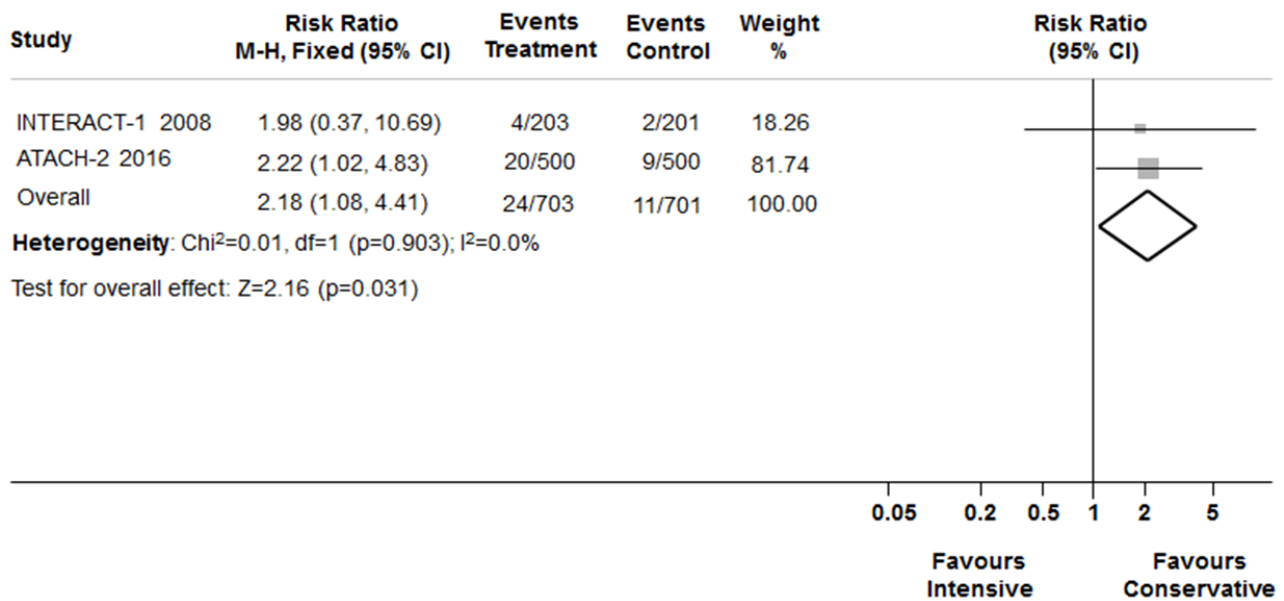

Effect estimates are based on a fixed-effects model.

Abbreviations: ATACH=Antihypertensive Treatment of Acute Cerebral Hemorrhage;

CI=confidence interval;  $\text{df}$ =degree of freedom; ICH ADAPT=The Intracerebral Hemorrhage

Acutely Decreasing Arterial Pressure Trial; INTERACT=Intensive Blood Pressure Reduction in

Acute Cerebral Haemorrhage Trial; M-H=Mantel-Haenszel.

**Figure e-2: Systolic blood pressure levels at 1, 6 and 24 hours since randomization in intensive versus conservative treatment**

**A. Systolic blood pressure at 1 hour since randomization**

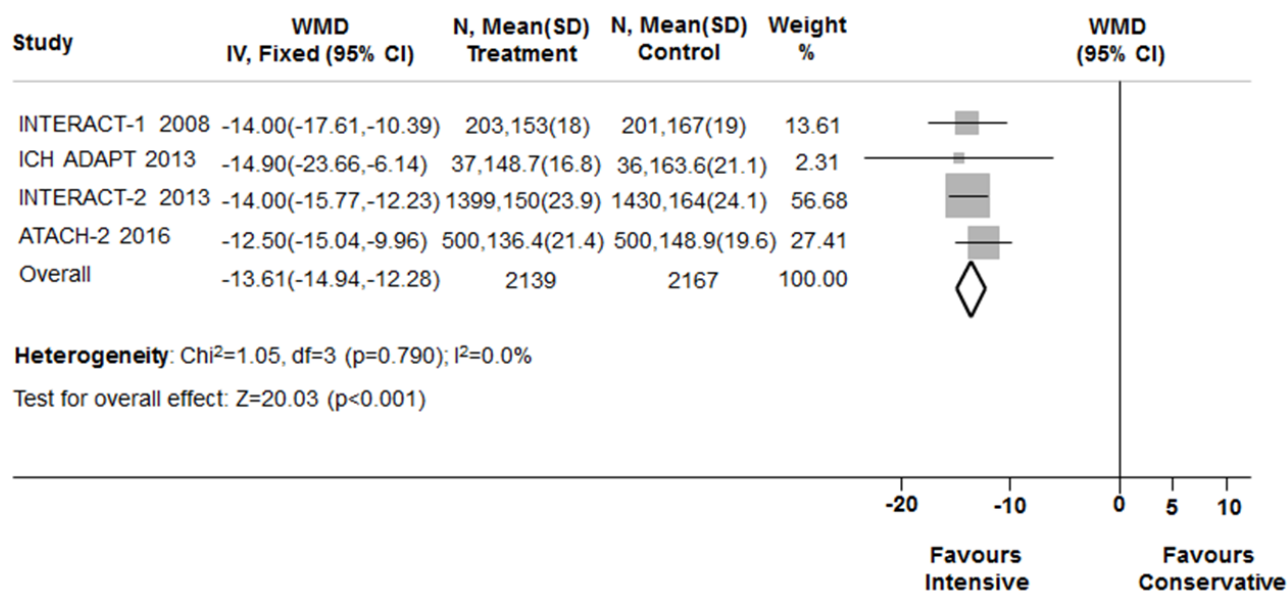

**B. Systolic blood pressure at 6 hours since randomization**

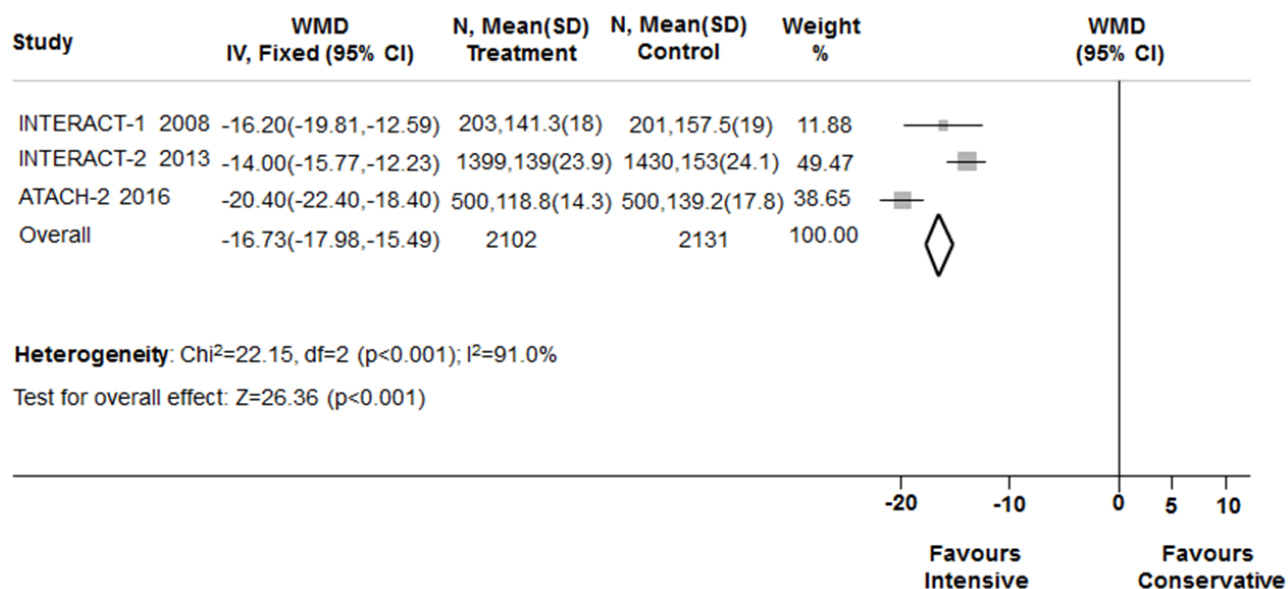

### C. Systolic blood pressure at 24 hours since randomization

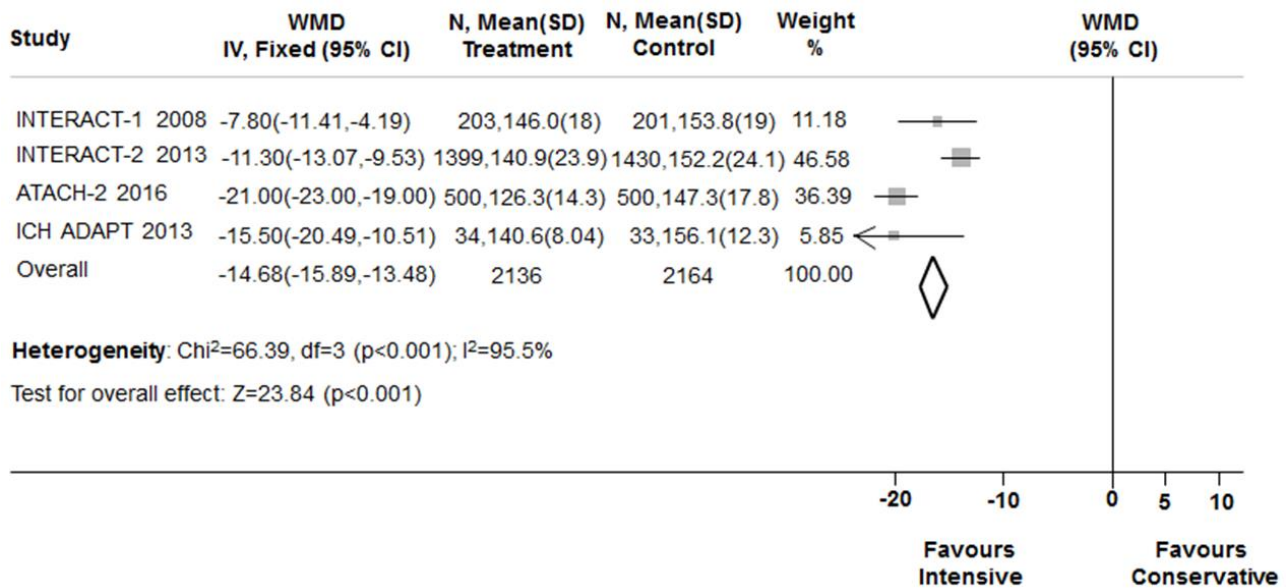

Effect estimates are based on a fixed-effects model. Where SD was not provided or could not be obtained from graph in trial publication, baseline data were used as conservative strategy.

Abbreviations: ATACH=Antihypertensive Treatment of Acute Cerebral Hemorrhage;

CI=confidence interval; df=degree of freedom; ICH ADAPT=The Intracerebral Hemorrhage

Acutely Decreasing Arterial Pressure Trial; INTERACT=Intensive Blood Pressure Reduction in

Acute Cerebral Haemorrhage Trial; IV=inverse variance; SD=standard deviation; WMD=weighted mean difference.

**Table e-3 Estimates of outcomes from random-effects analysis**

| <b>Outcome</b>                                                                  | <b>No. of studies</b> | <b>Effect size (95% CI)</b>   |
|---------------------------------------------------------------------------------|-----------------------|-------------------------------|
| Three-month mortality                                                           | 5                     | RR 0.99 (0.83-1.17)           |
| Three-month death or major disability                                           | 4                     | RR 0.96 (0.91-1.01)           |
| Absolute hematoma growth at 24 hours after randomization                        | 3                     | WMD -1.53 (-2.94 to -0.13)    |
| Substantial hematoma growth at 24 hours after randomization                     | 5                     | RR 0.86 (0.74-1.01)           |
| Early neurological deterioration                                                | 5                     | RR 1.03 (0.88-1.19)           |
| Hypotension within 72 hours after randomization                                 | 2                     | RR 1.55 (0.60-4.00)           |
| Severe hypotension within 72 hours after randomization                          | 2                     | RR 0.84 (0.37-1.95)           |
| Any serious treatment-related adverse event within 3 months after randomization | 3                     | RR 1.07 (0.90-1.29)           |
| Recurrent stroke (ischemic or haemorrhagic) within 3 months after randomization | 2                     | RR 0.95 (0.46-1.97)           |
| Acute coronary events within 3 months after randomization                       | 3                     | RR 1.11 (0.44-2.83)           |
| Renal failure within 3 months after randomization                               | 2                     | RR 2.18 (1.08-4.41)           |
| Systolic blood pressure at 1 hour since randomization                           | 4                     | WMD -13.61 (-14.94 to -12.28) |
| Systolic blood pressure at 6 hours since randomization                          | 3                     | WMD -16.88 (-21.32 to -12.44) |
| Systolic blood pressure at 24 hours since randomization                         | 4                     | WMD -13.94 (-20.19 to -7.68)  |

Abbreviations: CI=confidence interval; RR=risk ratio; WMD=weighted mean difference.

## **e-Appendix I**

### **PubMed search strategy**

The strategy was based on the Cochrane Highly Sensitive Search Strategy for identifying randomized trials.<sup>e-1</sup>

- #1 random\* OR trial\* [Title/Abstract]
- #2 "Randomized Controlled Trial"[Publication Type]
- #3 "Controlled Clinical Trial"[Publication Type]
- #4 #1 OR #2 OR #3
- #5 blood pressure [Title/Abstract] OR blood-pressure [Title/Abstract] OR blood pressure [MeSH Terms]
- #6 intracranial hemorrhage [Title/Abstract] OR cerebral hemorrhage [Title/Abstract] OR intracranial hemorrhage [MeSH Terms] OR cerebral hemorrhage [MeSH Terms]
- #7 #5 AND #6
- #8 #4 AND #7

### **CENTRAL search strategy** (“Cochrane Review Group: Stroke Group” | “Trials”)

- #1 blood pressure
- #2 intracranial OR cerebral hemorrhage
- #3 (#1 AND #2)

### **ClinicalTrials.gov search strategy**

“blood pressure” AND (intracranial OR cerebral hemorrhage”) | ”Interventional Studies”

**e-Appendix II**

**Funnel plot of comparison: Intensive versus conservative, outcome: 3-month mortality**

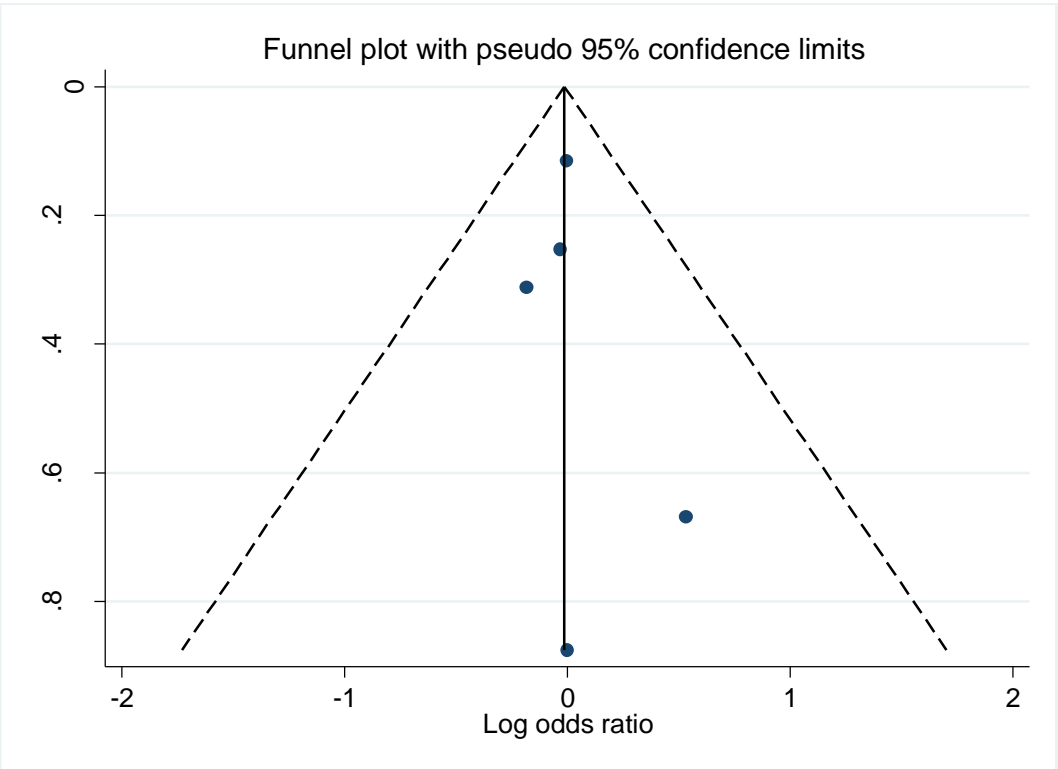

Egger statistical test  $p=0.708$

**Funnel plot of comparison: Intensive versus conservative, outcome: 3-month death or major disability**

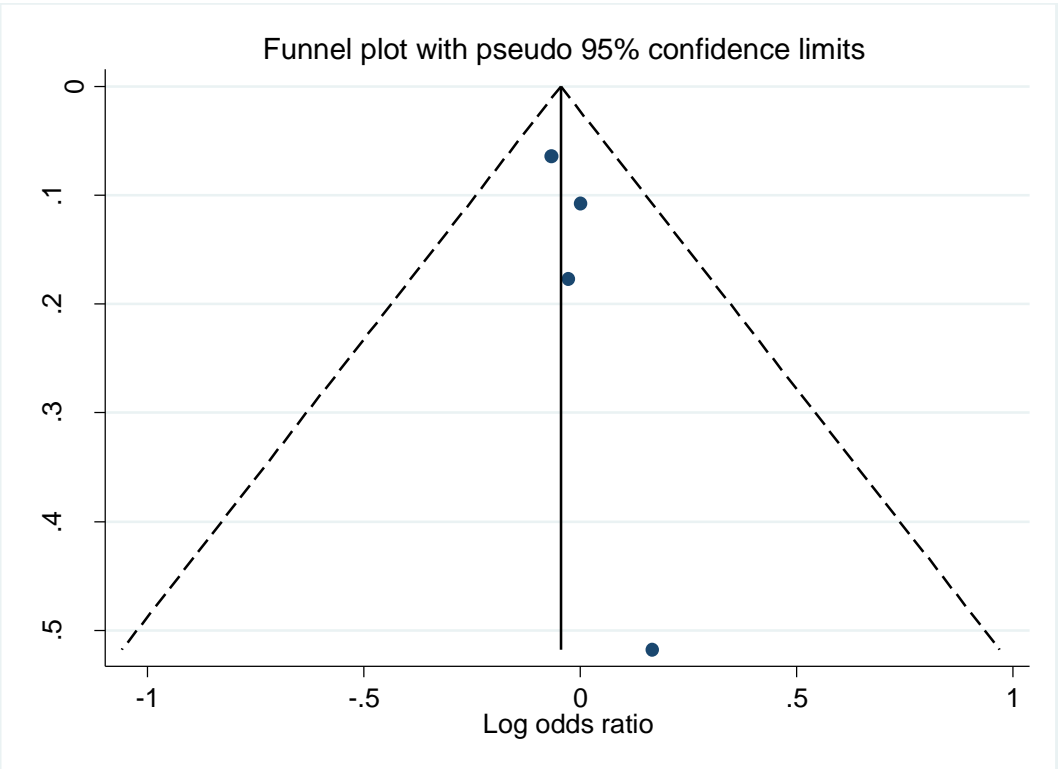

Egger statistical test  $p=0.179$

**Funnel plot of comparison: Intensive versus conservative, outcome: absolute hematoma growth**

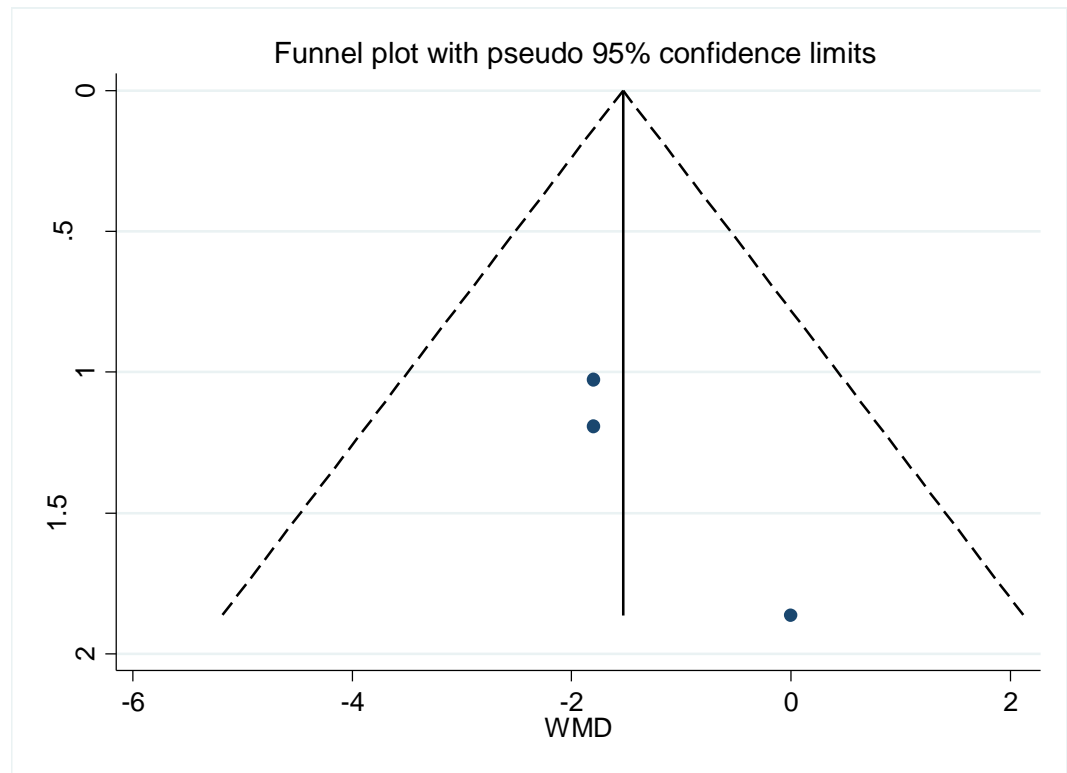

Egger statistical test  $p=0.172$

**Funnel plot of comparison: Intensive versus conservative, outcome: substantial hematoma enlargement**

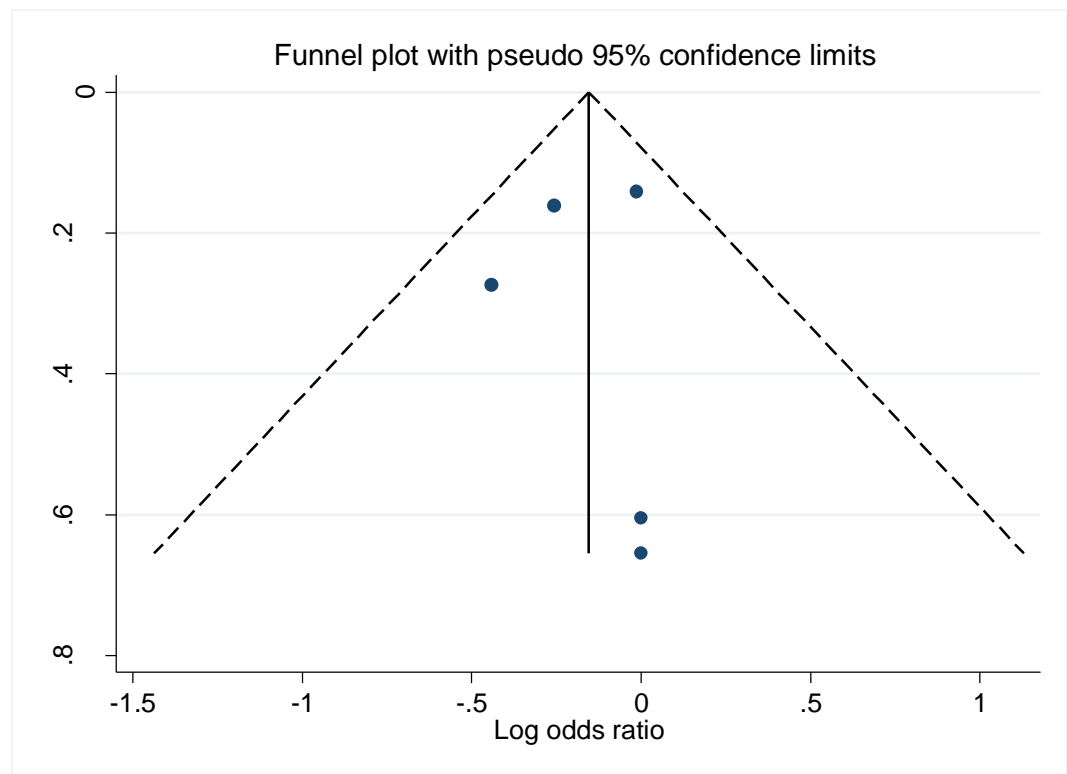

Egger statistical test  $p=0.851$

**Funnel plot of comparison: Intensive versus conservative, outcome: early neurological deterioration**

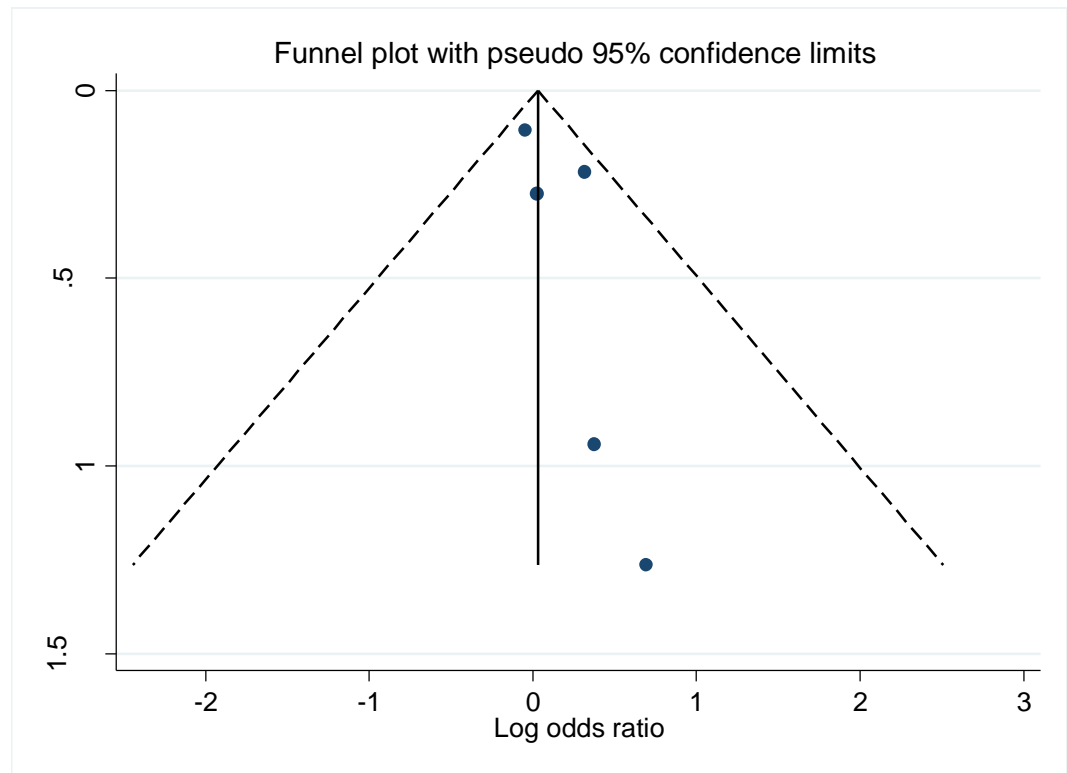

Egger statistical test  $p=0.244$

**Funnel plot of comparison: Intensive versus conservative, outcome: hypotension**

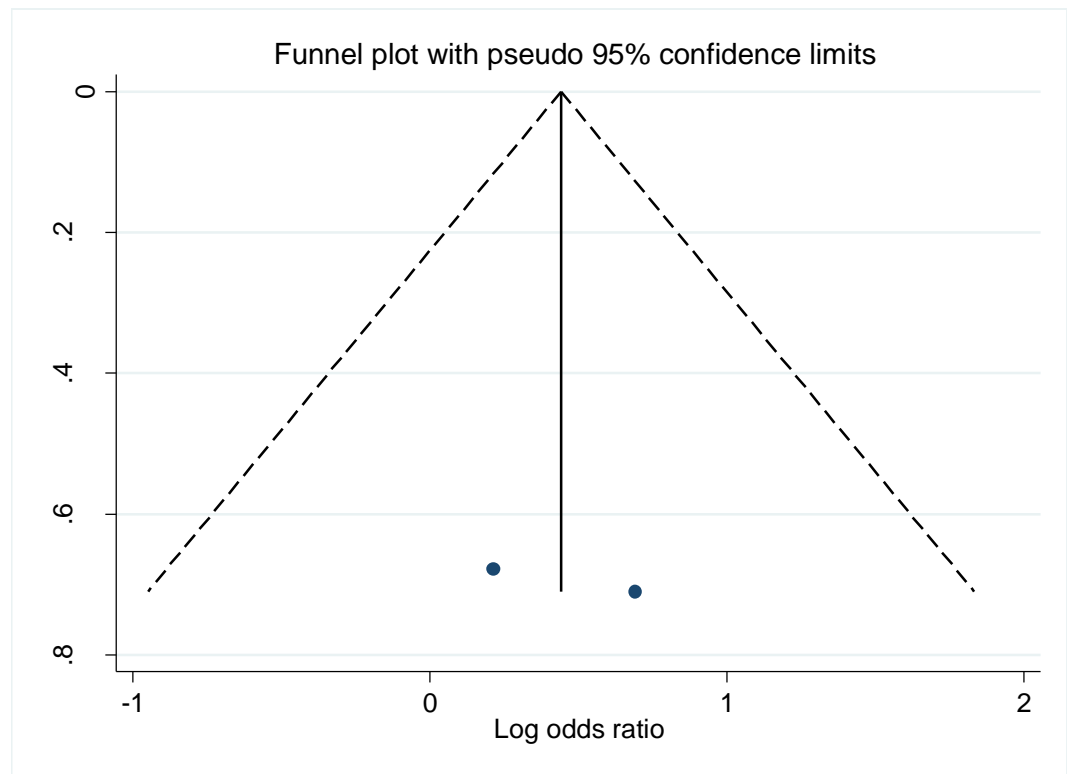

**Funnel plot of comparison: Intensive versus conservative, outcome: severe hypotension**

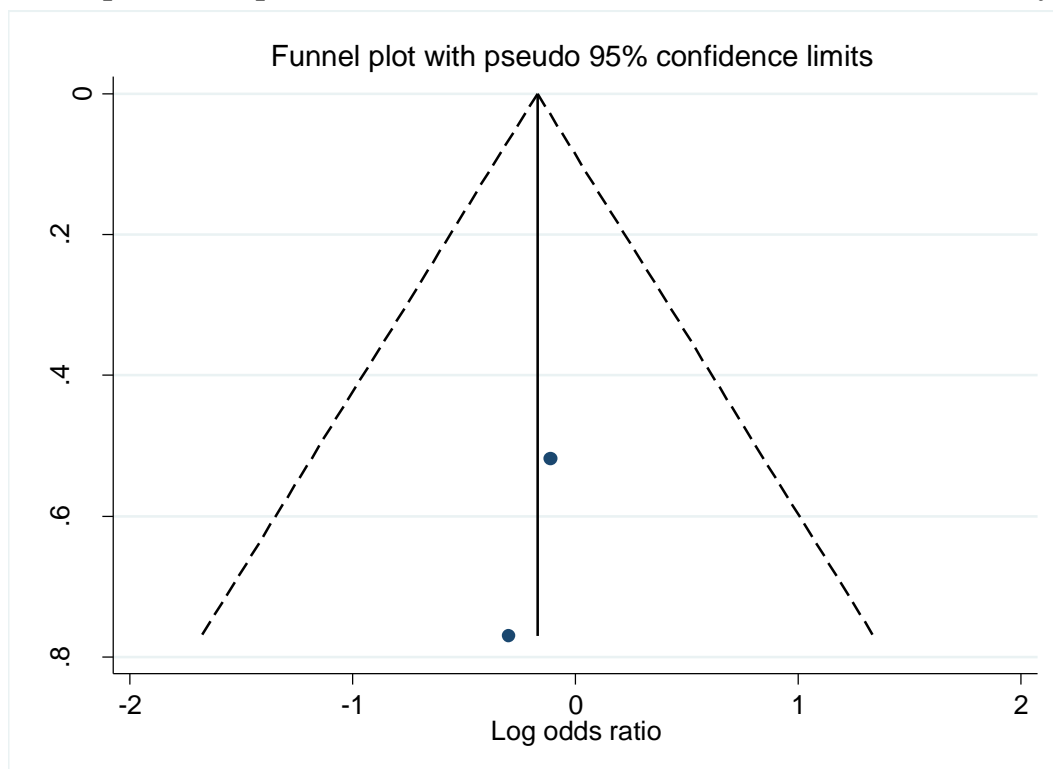

**Funnel plot of comparison: Intensive versus conservative, outcome: any serious treatment-emergent adverse event**

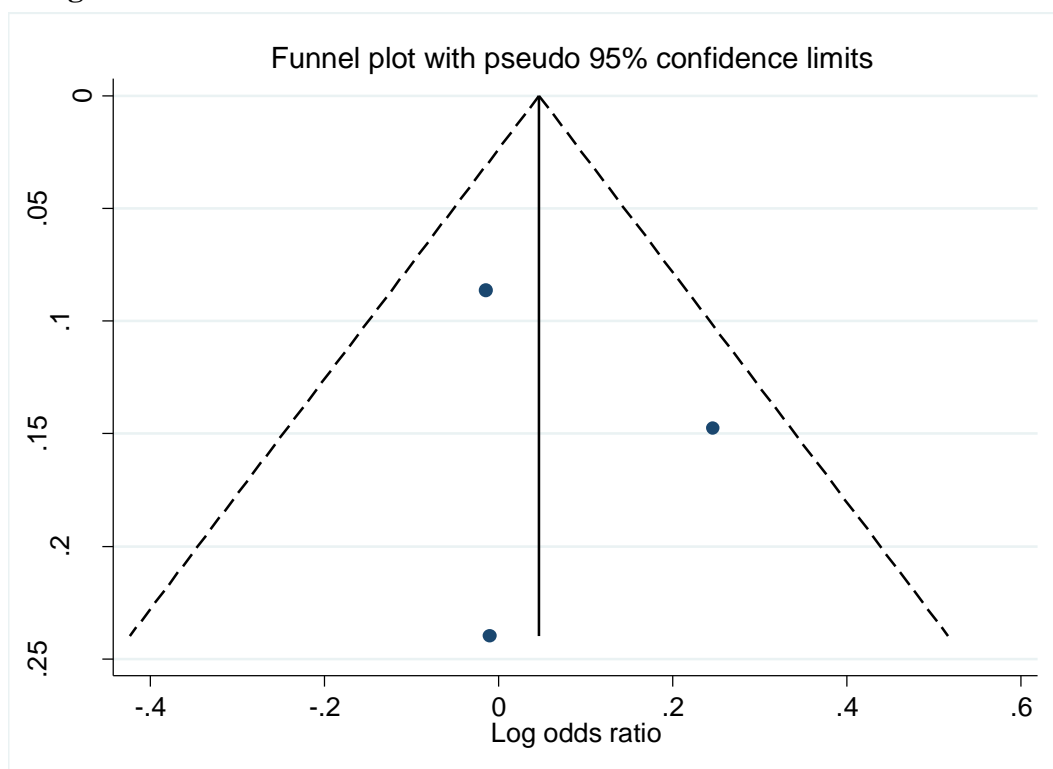

Egger statistical test  $p=0.734$

**Funnel plot of comparison: Intensive versus conservative, outcome: recurrent stroke**

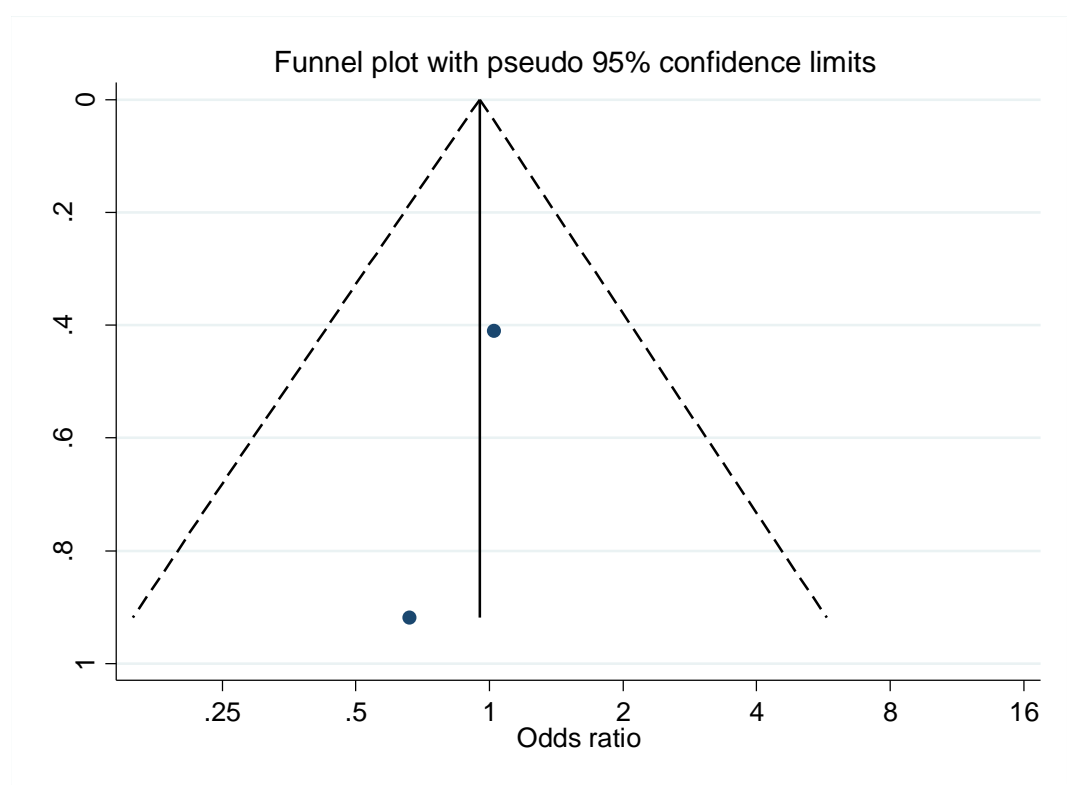

**Funnel plot of comparison: Intensive versus conservative, outcome: acute coronary event**

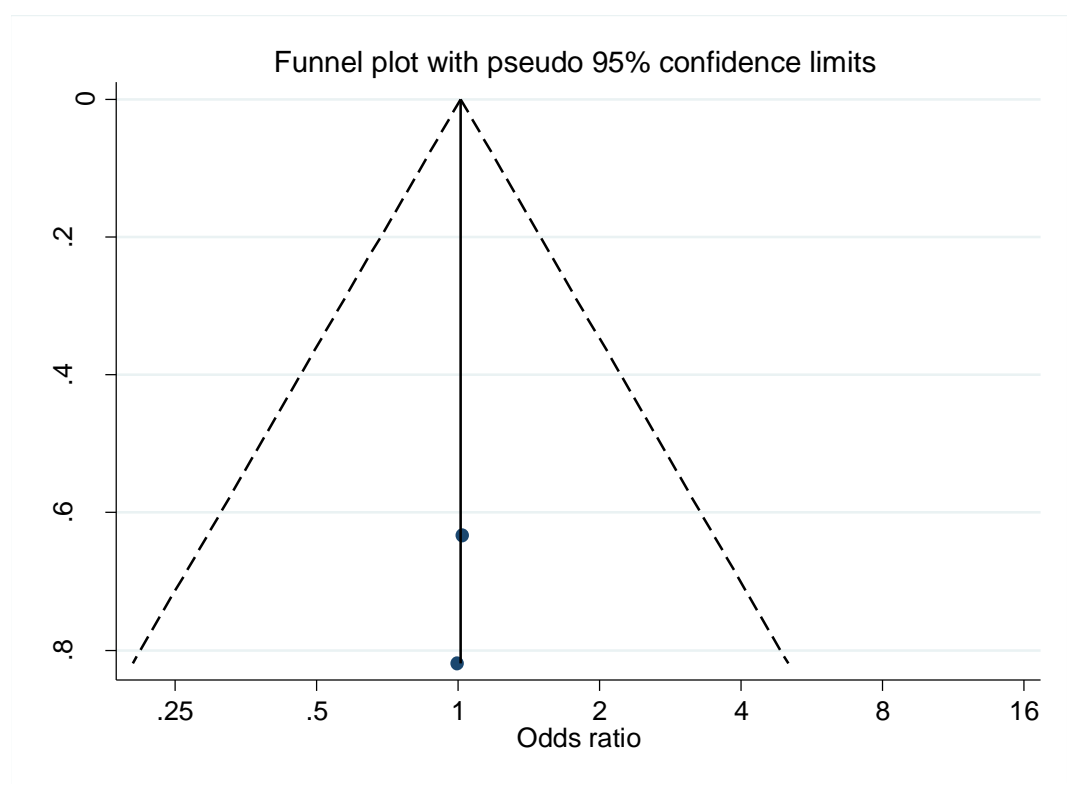

**Funnel plot of comparison: Intensive versus conservative, outcome: renal failure**

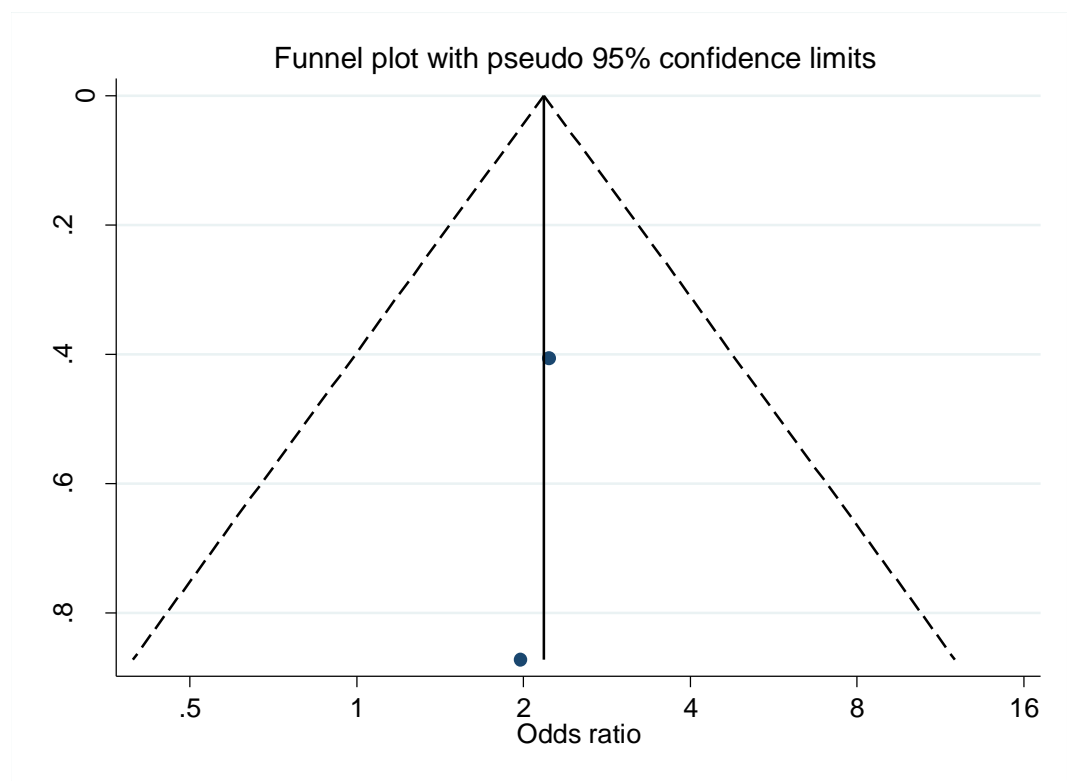

## **e-Reference**

e-1 Lefebvre C, Manheimer E, Glanville J. Chapter 6: Searching for studies. In: Higgins JPT, Green S (editors). Cochrane Handbook for Systematic Reviews of Interventions Version 5.0.2 (updated September 2009). The Cochrane Collaboration, 2009. Available from [www.cochranehandbook.org](http://www.cochranehandbook.org).
